# Supplementary material for: ABC transportome inventory of human pathogenic yeast Candida glabrata: Phylogenetic and expression analysis
Source: PLoS One. 2018 Aug 28;13(8):e0202993. doi: 10.1371/journal.pone.0202993 (PMC6112666; doi:10.1371/journal.pone.0202993)
Supplement: S1 File — (XLSX) [file pone.0202993.s002.xlsx]

## Sheet: Sheet1
Number of transmembrane domain prediction in all ABC proteins using different online tools
ABC protein coding genes	TOPCONS	OCTOPUS	PHILIUS	POLY PHOBIUS	SCAMPI	SPOCTOPUS	TMHMM	UNIPROT
CAGL0K00363g	12	12	12	12	12	12	12	12
CAGL0A01133g	6	6	3	6	6	6	3	3
CAGL0M13739g	6	6	5	6	5	6	5	5
CAGL0E00385g	6	6	6	6	6	6	5	4
CAGL0E03982g	17	19	17	17	17	19	16	16
CAGL0C03289g	17	20	17	17	17	17	14	13
CAGL0E03355g	18	18	17	17	16	18	17	17
CAGL0L06402g	17	17	14	17	16	17	14	13
CAGL0G00242g	14	14	11	12	14	14	10	10
CAGL0D00352g	6	6	2	6	5	6	4	4
CAGL0M02387g	5	6	3	6	5	5	1	1
CAGL0G08041g	0	0	0	0	0	0	0	0
CAGL0C02343g	0	0	0	0	0	0	0	0
CAGL0D03674g	0	0	0	0	0	0	0	0
CAGL0K10472g	0	0	0	0	0	0	0	0
CAGL0B03487g	0	0	0	0	0	0	0	0
CAGL0I08019g	12	12	13	13	12	12	12	11
CAGL0M01760g	14	13	12	15	12	14	12	12
CAGL0I04862g	12	12	13	13	12	12	11	11
CAGL0F02717g	13	13	12	15	12	13	10	12
CAGL0M07293g	13	13	12	15	12	13	10	10
CAGL0F01419g	13	13	12	14	12	13	12	12
CAGL0L07744g	7	7	8	9	8	7	8	8
CAGL0G05093g	0	0	0	0	0	0	0	0
CAGL0K12474g	0	0	0	0	0	0	0	0
